# Supplementary material for: Implementation and sustainability factors of two early-stage breast cancer conversation aids in diverse practices
Source: Springer Nature journal article supplement (doi:10.1186/s13012-021-01115-1), 2021-05-10

# Early stage breast cancer: What's right for me?

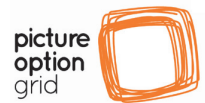

Use this **Picture Option Grid** to help you and your healthcare professional decide how best to treat early stage breast cancer (stages I to IIIA). The last page is for **your notes, thoughts, or any questions** for you to discuss with your doctor.

1. Will it affect how long I live?

Lumpectomy with radiation

Mastectomy

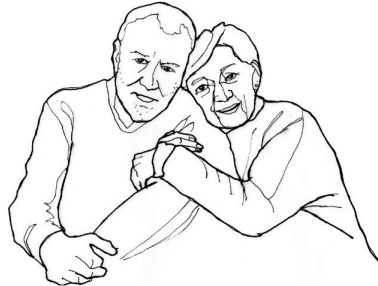

No, how long you live is the same for both surgeries.

2. Will cancer come back in the breast?

Lumpectomy with radiation

Mastectomy

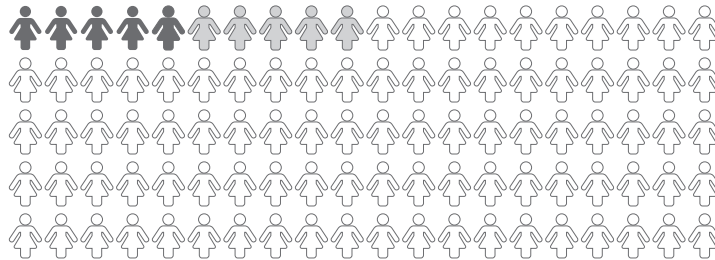

Within 10 years, breast cancer returns for about **5-10 in 100 women (5-10%)**. This depends on the cancer stage and tumor characteristics, rather than on the type of surgery. Please discuss your individual risks with your doctor.

3. What is removed in the breast?

Lumpectomy with radiation

Mastectomy

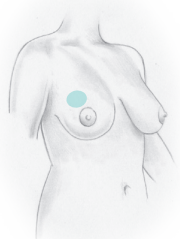

Only the cancer lump will be removed.

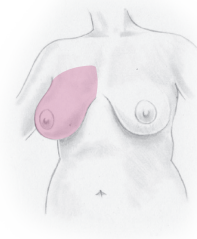

The whole breast will be removed.

#### 4. Will I need more than one surgery?

##### Lumpectomy with radiation

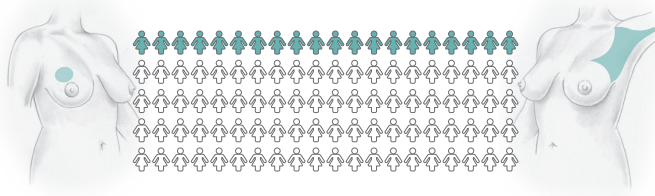

Possibly, **20 in 100 women (20%)** might need additional surgery to remove more breast tissue or lymph nodes that have cancer.

##### Mastectomy

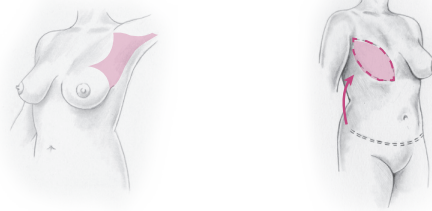

**Possibly**, if your lymph nodes have cancer. **Yes**, if you choose breast reconstruction.

#### 5. How long will it take me to recover?

##### Lumpectomy with radiation

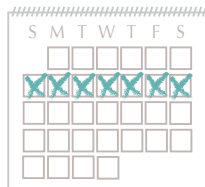

Most women are home on the same day as surgery  
**...but this may vary.**  
It will take about a week, or more, before you can resume usual activities.

##### Mastectomy

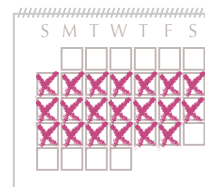

**...or longer with reconstruction.**  
It will take several weeks, or longer, before you can resume usual activities.

#### 6. Will I need radiation in the breast?

##### Lumpectomy with radiation

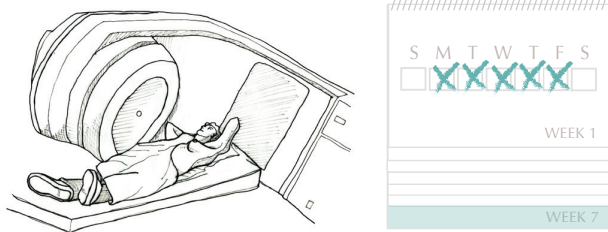

Yes, it will mean visits to the hospital **five days a week**, for up to **seven weeks** after surgery.

##### Mastectomy

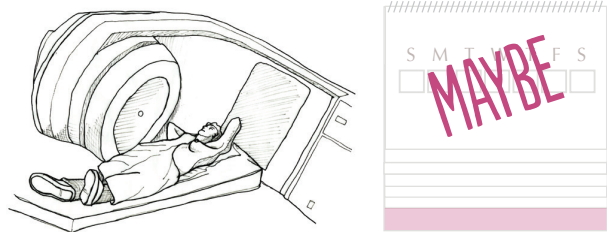

Radiation is **not usually given** after a mastectomy but may **sometimes** be recommended.

### 7. Will my lymph nodes be removed?

Lumpectomy with radiation

Mastectomy

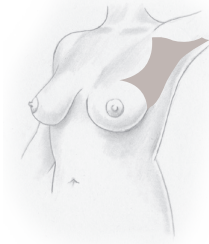

Possibly, if cancer spreads to the lymph nodes under your arm. Your doctor will discuss with you whether you should consider further treatment such as surgery or radiotherapy.

### 8. Will I need chemotherapy and lose my hair?

Lumpectomy with radiation

Mastectomy

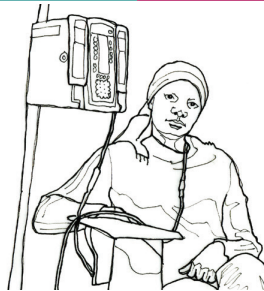

You may be offered chemotherapy, but this does not depend on the surgery you choose. Hair loss is common after chemotherapy.

### 9. How much will it cost?

Lumpectomy with radiation

Mastectomy

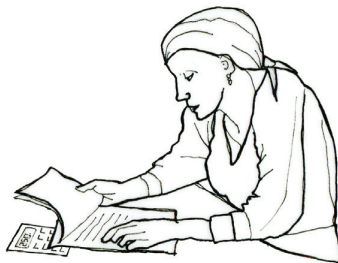

Both options have similar costs.

It is best to know what is covered by your insurance and what your out of pocket costs may be. Don't hesitate to ask your care team about this. They will know who can answer your questions.

## Notes and questions

Now that you have looked at the Picture Option Grid, this page is for your notes, thoughts or any questions for you to discuss with your doctor.

1. Will it affect how long I live?

-----  
-----  
-----

6. Will I need radiation in the breast?

-----  
-----  
-----

2. Will cancer come back in the breast?

-----  
-----  
-----

7. Will my lymph nodes be removed?

-----  
-----  
-----

3. What is removed in the breast?

-----  
-----  
-----

8. Will I need chemotherapy and lose my hair?

-----  
-----  
-----

4. Will I need more than one surgery?

-----  
-----  
-----

9. How much will it cost?

-----  
-----  
-----

5. How long will it take me to recover?

-----  
-----  
-----

Other questions/thoughts:

-----  
-----  
-----

# Cáncer de mama en etapa temprana: ¿Qué es lo adecuado para mí?

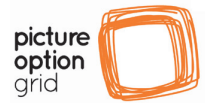

Utilice esta herramienta de toma de decisiones ilustrada para ayudarle a usted y a su profesional de la salud a decidir la mejor manera de tratar su cáncer de mama en etapa temprana (etapas I a IIIA). La última página es para sus notas, pensamientos o cualquier pregunta, para que usted pueda hablar con su médico.

## 1. ¿Podría afectar mi esperanza de vida?

Tumorectomía con radioterapia

Mastectomía



Su esperanza de vida es la misma con ambas cirugías.

## 2. ¿Volverá el cáncer en la mama?

Tumorectomía con radioterapia

Mastectomía

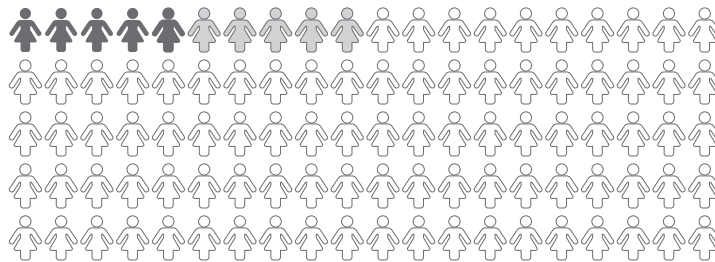

Dentro de 10 años, el cáncer de mama reaparece en alrededor **5 a 10 en cada 100 mujeres (5-10%)**. Esto depende de la etapa del cáncer y las características del tumor, no del tipo de cirugía. Por favor converse con su médico acerca de sus riesgos.

## 3. ¿Qué se extirpa de la mama?

Tumorectomía con radioterapia

Mastectomía

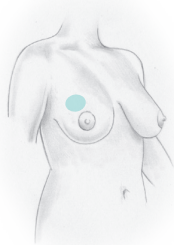

Se extirpará solo el tumor cancerígeno.

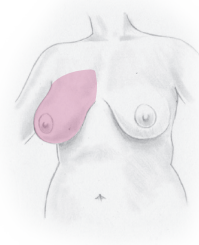

Se extirpará toda la mama.

#### 4. ¿Necesitaré más de una cirugía?

##### Tumorectomía con radioterapia

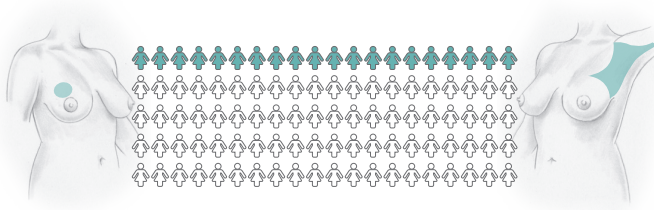

Posiblemente, **20 de cada 100 mujeres (20%)** podrían necesitar una cirugía adicional para remover más tejido mamario o ganglios linfáticos con cáncer.

##### Mastectomía

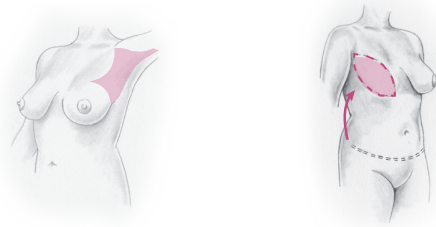

**Posiblemente**, si sus ganglios linfáticos tienen cáncer.

**Sí**, si elige realizarse reconstrucción de la mama.

#### 5. ¿Cuánto tardaré en recuperarme?

##### Tumorectomía con radioterapia

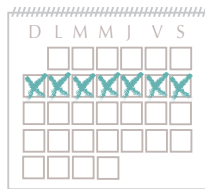

La mayoría de las mujeres vuelven a casa el mismo día de la cirugía  
**... pero esto puede variar.** Le tomará aproximadamente una semana o más antes de que pueda volver a realizar sus actividades habituales.

##### Mastectomía

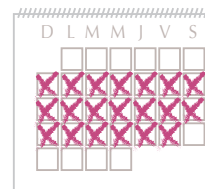

... **o más tiempo si se hace una reconstrucción mamaria.** Le tomará varias semanas, o más tiempo antes de que se pueda volver a realizar sus actividades habituales.

#### 6. ¿Necesitaré radioterapia en la mama?

##### Tumorectomía con radioterapia

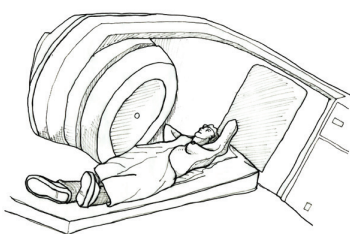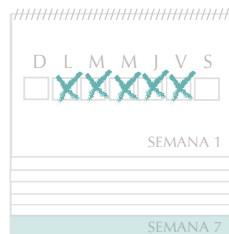

Sí, esto significará visitas al hospital **cinco días a la semana**, por hasta **siete semanas** después de la cirugía.

##### Mastectomía

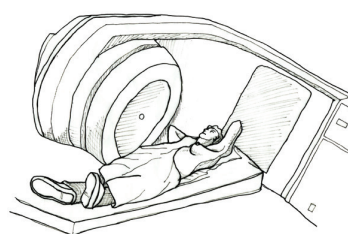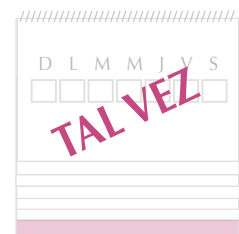

En general **no se necesita** radioterapia después de una mastectomía, pero **en ciertas ocasiones** puede ser recomendada.

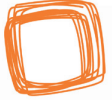

## 7. ¿Se extirparán mis ganglios linfáticos?

Tumorectomía con radioterapia

Mastectomía

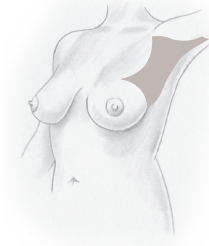

Si el cáncer se ha propagado a los ganglios linfáticos debajo de su brazo, su médico conversará con usted sobre la necesidad de considerar algún tratamiento adicional como cirugía o radioterapia.

## 8. ¿Necesitaré quimioterapia y perderé el cabello?

Tumorectomía con radioterapia

Mastectomía

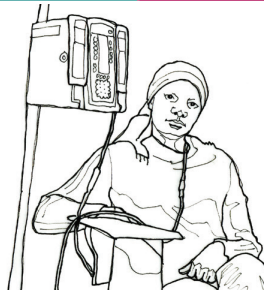

Se le puede ofrecer quimioterapia, pero esto no depende de la cirugía que elija. La pérdida de cabello es común después de la quimioterapia.

## 9. ¿Cuánto costará?

Tumorectomía con radioterapia

Mastectomía

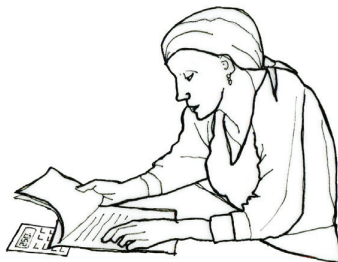

Ambas opciones quirúrgicas tienen costos similares. Es mejor saber cuáles son los costos que serán cubiertos por su seguro de salud y cuáles son los costos que usted deberá pagar de su bolsillo. No dude en hacer preguntas a su equipo de salud acerca de los costos de su tratamiento. Ellos sabrán quiénes pueden ayudarle y responder sus preguntas.



## Notas y preguntas:

Ahora que usted ya ha visto la herramienta de toma de decisiones, utilice esta página para sus notas, pensamientos o cualquier pregunta que quiera conversar con su médico.

**1. ¿ Podría afectar mi esperanza de vida?**

-----  
-----  
-----

**6. ¿Necesitaré radioterapia en la mama?**

-----  
-----  
-----

**2. ¿Volverá el cáncer en la mama?**

-----  
-----  
-----

**7. ¿ Se extirparán mis ganglios linfáticos?**

-----  
-----  
-----

**3. ¿Qué se extirpa de la mama?**

-----  
-----  
-----

**8. ¿Necesitaré quimioterapia y perderé el cabello?**

-----  
-----  
-----

**4. ¿Necesitaré más de una cirugía?**

-----  
-----  
-----

**9. ¿Cuánto costará?**

-----  
-----  
-----

**5. ¿Cuánto tardaré en recuperarme?**

-----  
-----  
-----

**Otras preguntas/pensamientos:**

-----  
-----  
-----



# 早期乳腺癌：什么适合我？

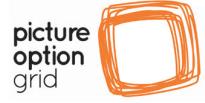

使用此Picture Option Grid来帮助您和您的医疗服务人员决定最合适的早期乳腺癌治疗方案（I至IIIA期）。最后一页是您的笔记，写下任何想法或问题，以用于与您的医生讨论。

## 1. 它对我的寿命长短有影响吗？

乳房肿瘤切除和放射治疗

乳房切除术

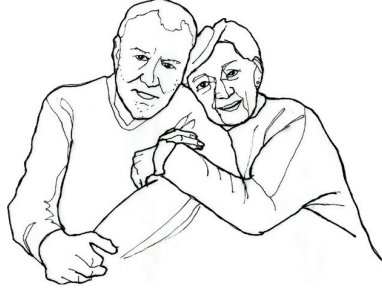

两种手术对寿命长短影响相同。

## 2. 乳房癌症会复发吗？

乳房肿瘤切除和放射治疗

乳房切除术

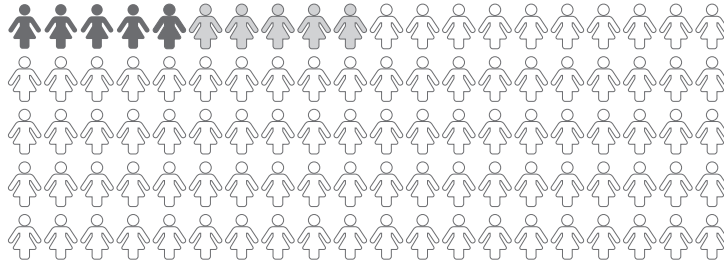

在10年内，100名女性中约有5至10名（5-10%）的乳腺癌会复发。  
这取决于癌症阶段和肿瘤特征，而不取决于手术方案。  
请与您的医生讨论您的个人风险。

## 3. 会切除乳房中的什么东西？

乳房肿瘤切除和放射治疗

乳房切除术

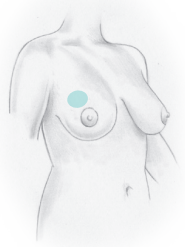

只切除癌症肿块。

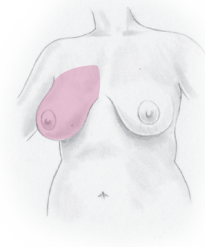

整个乳房将被切除。

#### 4. 我会需要多次手术吗？

##### 乳房肿瘤切除和放射治疗

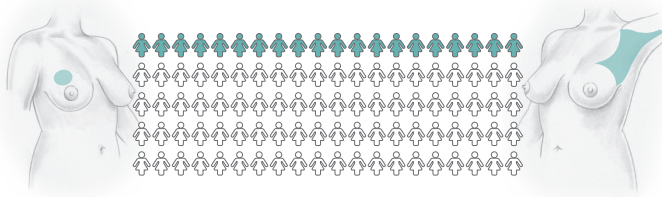

有可能，100名妇女中有20名（20%）可能需要额外的手术，切除更多患有癌症的乳腺组织或淋巴结。

##### 乳房切除术

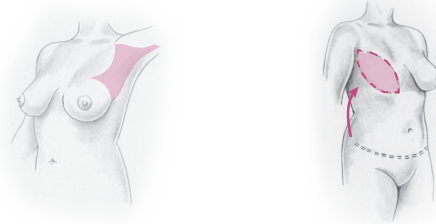

有可能，如果您的淋巴结有癌症。

是的，如果您选择乳房再造。

#### 5. 恢复需要多长时间？

##### 乳房肿瘤切除和放射治疗

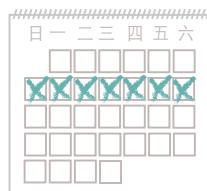

...这可能因人而异。  
大约需要一个星期左右，或更长的时间，您才可以恢复正常活动。

##### 乳房切除术

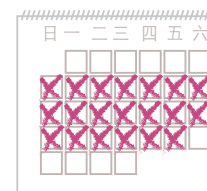

大多数妇女在手术当天回家

.... 乳房再造则需要更长的时间。会需要几个星期，或更长的时间，您才可以恢复正常活动。

#### 6. 我需要在乳房接受放射治疗吗？

##### 乳房肿瘤切除和放射治疗

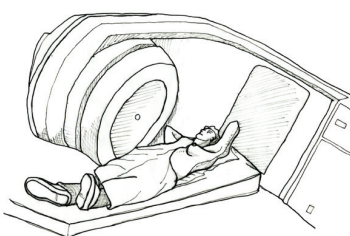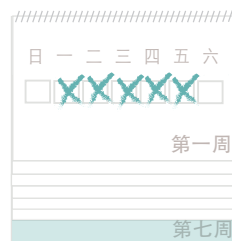

是的，这将意味着手术后一周要到医院治疗五天，最长可能需要七个星期。

##### 乳房切除术

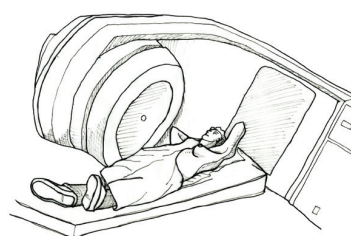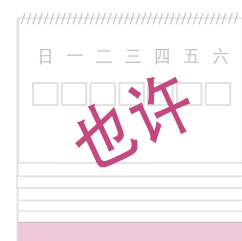

在乳房切除术后通常不给予放射治疗，但有时可能会推荐给您。

## 7. 我的淋巴结会被切除吗？

乳房肿瘤切除和放射治疗

乳房切除术

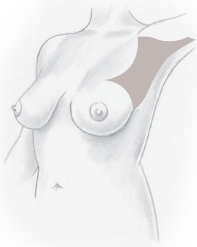

如果癌症扩散到您腋下的淋巴结，您的医生会和您讨论是否应考虑进一步的治疗，如手术或放射治疗。

## 8. 我会需要化学治疗且会脱发吗？

乳房肿瘤切除和放射治疗

乳房切除术

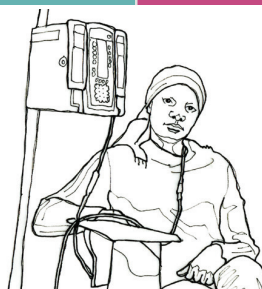

不论您选择的手术为何，我们都可能向您建议化学治疗。脱发是化学治疗常见的副作用。

## 9. 费用是多少？

乳房肿瘤切除和放射治疗

乳房切除术

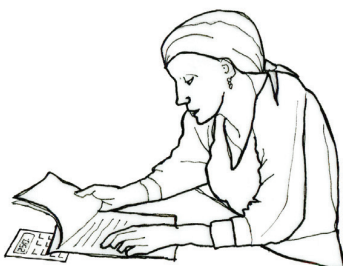

这两个选项的费用相似。您最好事先知道哪些是您的医疗保险会给付的，而哪些是自费的。

## 备注和问题

现在您已经看过Picture Option Grid，此页用于记下您的笔记、想法或疑问，以用于与您的医生讨论。

1. 它对我的寿命长短有影响吗？

-----  
-----  
-----

6. 我会需要在乳房接受放射治疗吗？

-----  
-----  
-----

2. 乳房癌症会复发吗？

-----  
-----  
-----

7. 我的淋巴结会被切除吗？

-----  
-----  
-----

3. 会切除乳房中的什么东西？

-----  
-----  
-----

8. 我会需要化学治疗且会脱发吗？

-----  
-----  
-----

4. 我会需要多次手术吗？

-----  
-----  
-----

9. 费用是多少？

-----  
-----  
-----

5. 恢复需要多长时间？

-----  
-----  
-----

其他问题/想法：

-----  
-----  
-----

早期乳腺癌：什么适合我？

编辑：Marie-Anne Durand, Lisa Caldon, Kari Rosenkranz, Dale Collins Vidal, Stephanie Sivell, Malcolm Reed, Glyn Elwyn

证据文件：<http://optiongrid.org/cpresources/grid/evidences/9.pdf?x=Z4wDIBhPB>

出版日期：2017年8月23日 过期日期：2019年8月23日

ISBN: 978-0-9550975-6-0 许可证：CC BY-NC-ND 4.0 (国际)

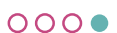

Supplement: MOESM3 [file 19151052]
