# Supplementary material for: Implementation and sustainability factors of two early-stage breast cancer conversation aids in diverse practices
Source: Springer Nature journal article supplement (doi:10.1186/s13012-021-01115-1), 2021-05-10
Supplement: MOESM2 [file 19151052]

## Breast cancer: surgical options

Use this **Option Grid™** decision aid to help you and your healthcare professional talk about how to best treat your breast cancer. This decision aid is for women with early stage breast cancer (stages I to IIIA).

| Frequently asked questions                                       | Lumpectomy with radiation                                                                                                                                  | Mastectomy                                                                                                                                                 |
|------------------------------------------------------------------|------------------------------------------------------------------------------------------------------------------------------------------------------------|------------------------------------------------------------------------------------------------------------------------------------------------------------|
| <b>What is removed?</b>                                          | The cancer lump is removed, with some surrounding tissue.                                                                                                  | The whole breast is removed.                                                                                                                               |
| <b>Which surgery is best for long-term survival?</b>             | Long-term survival rates are the same for both surgeries.                                                                                                  | Long-term survival rates are the same for both surgeries.                                                                                                  |
| <b>What are the chances of cancer coming back in the breast?</b> | Breast cancer will come back in the breast in about 5 to 10 in 100 women (5-10%) in the 10 years after a lumpectomy.                                       | Breast cancer will come back in the area of the scar in about 5 to 10 in 100 women (5-10%) in the 10 years after a mastectomy.                             |
| <b>Will I need more than one surgery?</b>                        | Possibly, 20 in 100 women (20%) may need another surgery to remove breast tissue or lymph node that have cancer.                                           | Possibly, if your lymph nodes have cancer.<br>Yes, if you choose breast reconstruction.                                                                    |
| <b>How long will it take to recover?</b>                         | Most women are home within 24 hours of surgery.                                                                                                            | Most women are home within 24 hours of surgery. It may take longer with reconstruction.                                                                    |
| <b>Will I need radiation after surgery?</b>                      | Yes, for up to seven weeks after surgery.                                                                                                                  | Radiation is not usually given after mastectomy.                                                                                                           |
| <b>Will my lymph nodes be removed?</b>                           | If cancer has spread to the lymph nodes under your arm, your doctor will discuss with you whether you need more treatment such as surgery or radiotherapy. | If cancer has spread to the lymph nodes under your arm, your doctor will discuss with you whether you need more treatment such as surgery or radiotherapy. |
| <b>Will I need chemotherapy?</b>                                 | You may be offered chemotherapy, but this does not depend on the surgery you choose.                                                                       | You may be offered chemotherapy, but this does not depend on the surgery you choose.                                                                       |
| <b>Will I lose my hair?</b>                                      | Hair loss is common after chemotherapy.                                                                                                                    | Hair loss is common after chemotherapy.                                                                                                                    |

## Cáncer de mama: opciones quirúrgicas

Use esta herramienta de toma de decisiones **Option Grid™** para ayudarle a usted y a su profesional de la salud a conversar sobre cuál es el mejor tratamiento para su cáncer de mama. Esta herramienta de toma de decisiones es para mujeres con cáncer de mama en etapa temprana (Etapa I a IIIA).

| Preguntas frecuentes                                                 | Tumorectomía con radiación                                                                                                                                                           | Mastectomía                                                                                                                                                                          |
|----------------------------------------------------------------------|--------------------------------------------------------------------------------------------------------------------------------------------------------------------------------------|--------------------------------------------------------------------------------------------------------------------------------------------------------------------------------------|
| ¿Qué se extirpa?                                                     | Se extirpa el tumor cancerígeno, junto con algunos tejidos normales que lo rodean.                                                                                                   | Se extirpa toda la mama.                                                                                                                                                             |
| ¿Qué cirugía es mejor en términos de supervivencia a largo plazo?    | Las tasas de supervivencia a largo plazo son las mismas para ambas cirugías.                                                                                                         | Las tasas de supervivencia a largo plazo son las mismas para ambas cirugías.                                                                                                         |
| ¿Cuáles son las probabilidades de que vuelva a tener cáncer de mama? | El cáncer de mama reaparece en aproximadamente 5 a 10 de cada 100 mujeres (5-10%) en los 10 años siguientes a la Tumorectomía.                                                       | El cáncer de mama reaparece en el área de la cicatriz en aproximadamente 5 a 10 de cada 100 mujeres (5-10%) en los 10 años siguientes a la mastectomía.                              |
| ¿Podría necesitar más de una cirugía?                                | Es posible. 20 de cada 100 mujeres (20%) pueden necesitar otra cirugía para extirpar el tejido mamario o ganglios linfáticos con cáncer.                                             | Es posible, si sus ganglios linfáticos tienen cáncer. También podría necesitar otra cirugía si decide realizarse una reconstrucción mamaria.                                         |
| ¿Cuánto tardaré en recuperarme?                                      | La mayoría de las mujeres regresan a su casa dentro de 24 horas después de la cirugía.                                                                                               | La mayoría de las mujeres regresa a su casa dentro de 24 horas después de la cirugía. Si se realiza una reconstrucción mamaria podría tomar más tiempo.                              |
| ¿Necesitaré radioterapia después de la cirugía?                      | Sí, por hasta siete semanas después de la cirugía.                                                                                                                                   | No se suele hacer radioterapia después de una mastectomía.                                                                                                                           |
| ¿Se extirparán mis ganglios linfáticos?                              | Si el cáncer se ha propagado a los ganglios linfáticos debajo de su brazo, su médico conversará con usted sobre la necesidad de algún otro tratamiento, como cirugía o radioterapia. | Si el cáncer se ha propagado a los ganglios linfáticos debajo de su brazo, su médico conversará con usted sobre la necesidad de algún otro tratamiento, como cirugía o radioterapia. |
| ¿Necesitaré quimioterapia?                                           | Se le puede ofrecer quimioterapia, pero esto no depende de la cirugía que elija.                                                                                                     | Se le puede ofrecer quimioterapia, pero esto no depende de la cirugía que elija.                                                                                                     |
| ¿Perderé mi cabello?                                                 | La pérdida de cabello es común después de la quimioterapia.                                                                                                                          | La pérdida de cabello es común después de la quimioterapia.                                                                                                                          |

## 乳腺癌：外科选择

使用 **Option Grid™** 来帮助您和您的医护专业人员讨论最合适的治疗方案。此文件是给患有早期乳腺癌 (I 至 IIIA 期) 的女性使用的。

| 常见问题            | 乳房肿瘤切除和放射治疗                                          | 乳房切除术                                                    |
|-----------------|------------------------------------------------------|----------------------------------------------------------|
| 切除什么？           | 切除癌症肿块以及周围的一些组织。                                     | 切除整个乳房。                                                  |
| 哪种手术是长期生存的最佳选择？ | 这两种手术的长期存活率是一样的。                                     | 这两种手术的长期存活率是一样的。                                         |
| 乳腺癌复发几率是多少？     | 在乳房肿瘤切除术后的 10 年中，每 100 名女性中约有 5-10 名 (5-10%) 会复发乳腺癌。 | 在乳房切除术后的 10 年中，每 100 名女性中约有 5-10 名 (5-10%) 的乳腺癌会在疤痕部位复发。 |
| 我将需要多次乳房手术吗？    | 有可能，100 名女性中有 20 (20%) 名可能需要再次手术，切除更多患有癌症的乳腺组织或淋巴结。  | 有可能，如果您的淋巴结有癌症。<br>是的，如果您选择乳房再造。                         |
| 恢复需要多长时间？       | 大多数女性在手术后 24 个小时内就可以回家。                              | 大多数女性在手术后 24 个小时内就可以回家，如果选择乳房再造则需要更长的时间。                 |
| 我在手术后需要放射治疗吗？   | 是的，手术后最多持续七周。                                        | 乳房切除术后通常不进行放射治疗。                                         |
| 我的淋巴结会被切除吗？     | 如果癌症扩散到您腋下的淋巴结，您的医生会和您讨论是否应考虑进一步的治疗，如手术或放射治疗。        | 如果癌症扩散到您腋下的淋巴结，您的医生会和您讨论是否应考虑进一步的治疗，如手术或放射治疗。            |
| 我会需要化学治疗吗？      | 可能向您提供化学治疗，但这并不取决于您选择的手术方案。                          | 可能向您提供化学治疗，但这并不取决于您选择的手术方案。                              |
| 我会脱发吗？          | 化学治疗后脱发是常见的。                                         | 化学治疗后脱发是常见的。                                             |
