# Supplementary material for: Implementation and sustainability factors of two early-stage breast cancer conversation aids in diverse practices
Source: Springer Nature journal article supplement (doi:10.1186/s13012-021-01115-1), 2021-05-10
Supplement: MOESM6 [file 19151052]

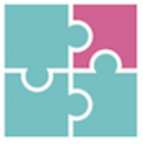

# Observation Grid

Name \_\_\_\_\_

Date \_\_\_\_\_

Time \_\_\_\_\_

Site \_\_\_\_\_

|                        | Probes                                                                               | Waiting Rooms | Hallways/Staff Areas |
|------------------------|--------------------------------------------------------------------------------------|---------------|----------------------|
| MATERIALS<br>(Observe) | Visible materials<br>e.g., pamphlets,<br>books                                       |               |                      |
|                        | Where are the<br>materials? How are<br>they presented?                               |               |                      |
|                        | Who is interacting<br>with the<br>materials?                                         |               |                      |
|                        | Any modification<br>in the use of<br>Option Grid or<br>Picture Option<br>Grid?       |               |                      |
|                        | Are the clinicians<br>using the tools<br>according to the<br>protocol?               |               |                      |
| CHATTER<br>(Observe)   | Are clinicians/<br>patients<br>discussing the<br>materials? What<br>are they saying? |               |                      |
|                        | What questions<br>are patients<br>asking about the<br>materials?                     |               |                      |
|                        | Any expression of<br>confusion,<br>frustration, relief,<br>etc.?                     |               |                      |
|                        | Are the clinicians<br>using the tools<br>according to the<br>protocol?               |               |                      |



# Observation Grid

Name \_\_\_\_\_

Date \_\_\_\_\_

Time \_\_\_\_\_

Site \_\_\_\_\_

|                                    |                                               |  |  |
|------------------------------------|-----------------------------------------------|--|--|
| <b>QUESTIONS</b><br>(Ask)          | What do you think of that document?           |  |  |
|                                    | Have you had to replace the materials at all? |  |  |
|                                    | How is it going with the WMM materials?       |  |  |
|                                    | How did that consultation go?                 |  |  |
|                                    | Is anything on your mind?                     |  |  |
| <b>FIELD NOTES</b><br>(Reflection) |                                               |  |  |
