# Supplementary material for: Implementation and sustainability factors of two early-stage breast cancer conversation aids in diverse practices
Source: Springer Nature journal article supplement (doi:10.1186/s13012-021-01115-1), 2021-05-10
Supplement: MOESM7 [file 19151052]

## NOMAD ITEMS BY CONSTRUCT

| <b>Construct</b>               | <b>Sub-Construct</b>             | <b>Items</b>                                                                                 |
|--------------------------------|----------------------------------|----------------------------------------------------------------------------------------------|
| <b>Coherence</b>               | <b>Differentiation</b>           | I can see how the [intervention] differs from usual ways of working                          |
|                                | <b>Communal specification</b>    | Staff in this organisation have a shared understanding of the purpose of this [intervention] |
|                                | <b>Individual specification</b>  | I understand how the [intervention] affects the nature of my own work                        |
|                                | <b>Internalization</b>           | I can see the potential value of the [intervention] for my work                              |
| <b>Cognitive Participation</b> | <b>Initiation</b>                | There are key people who drive the [intervention] forward and get others involved            |
|                                | <b>Legitimation</b>              | I believe that participating in the [intervention] is a legitimate part of my role           |
|                                | <b>Enrolment</b>                 | I'm open to working with colleagues in new ways to use the [intervention]                    |
|                                | <b>Activation</b>                | I will continue to support the [intervention]                                                |
| <b>Collective Action</b>       | <b>Interactional workability</b> | I can easily integrate the [intervention] into my existing work                              |
|                                | <b>Relational integration</b>    | The [intervention] disrupts working relationships                                            |
|                                | <b>Relational integration</b>    | I have confidence in other people's ability to use the [intervention]                        |
|                                | <b>Skill set workability</b>     | Work is assigned to those with skills appropriate to the [intervention]                      |
|                                | <b>Skill set workability</b>     | Sufficient training is provided to enable staff to use the [intervention]                    |
|                                | <b>Contextual Integration</b>    | Sufficient resources are available to support the [intervention]                             |
|                                | <b>Contextual integration</b>    | Management adequately support the [intervention]                                             |
| <b>Reflexive Monitoring</b>    | <b>Systemisation</b>             | I am aware of reports about the effects of the [intervention]                                |
|                                | <b>Communal appraisal</b>        | The staff agree that the [intervention] is worthwhile                                        |
|                                | <b>Individual appraisal</b>      | I value the effects the [intervention] has had on my work                                    |
|                                | <b>Reconfiguration</b>           | Feedback about the [intervention] can be used to improve it in the future                    |
|                                | <b>Reconfiguration</b>           | I can modify how I work with the [intervention]                                              |
